# Supplementary material for: Hybrid Organic–Inorganic Perovskite Superstructures for Ultrapure Green Emissions
Source: MDPI journal article supplement (doi:10.3390/nano13050815), 2023-02-22
Supplement: s1 [file s1]

# Hybrid Organic–Inorganic Perovskite Superstructures for Ultrapure Green Emissions

Wen Kiat Chan <sup>1</sup>, Jiawei Chen <sup>2</sup>, Donglei Zhou <sup>3</sup>, Junzhi Ye <sup>2</sup>, Ricardo Javier Vázquez <sup>4,5</sup>, Cheng Zhou <sup>4</sup>, Guillermo Carlos Bazan <sup>4,5</sup>, Akshay Rao <sup>2</sup>, Zhongzheng Yu <sup>1,2,\*</sup> and Timothy Thatt Yang Tan <sup>1,\*</sup>

<sup>1</sup> School of Chemistry, Chemical Engineering and Biotechnology, Nanyang Technological University, Singapore 637459, Singapore

<sup>2</sup> Cavendish Laboratory, University of Cambridge, Cambridge CB3 0HE, UK

<sup>3</sup> State Key Laboratory of Integrated Optoelectronics, College of Electronic Science and Engineering, Jilin University, Changchun 130012, China

<sup>4</sup> Department of Chemistry, National University of Singapore, Singapore 117543, Singapore

<sup>5</sup> Institute for Functional Intelligent Materials, National University of Singapore, Singapore 117544, Singapore

\* Correspondence: yuzh0010@e.ntu.edu.sg (Z.Y.); tytan@ntu.edu.sg (T.T.Y.T.)

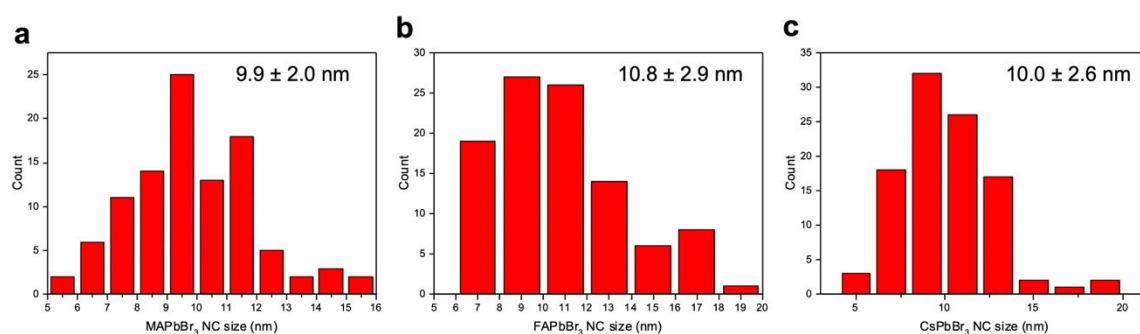

Figure S1. Particle size distributions of (a) MAPbBr<sub>3</sub>, (b) FAPbBr<sub>3</sub>, and (c) CsPbBr<sub>3</sub> NCs.

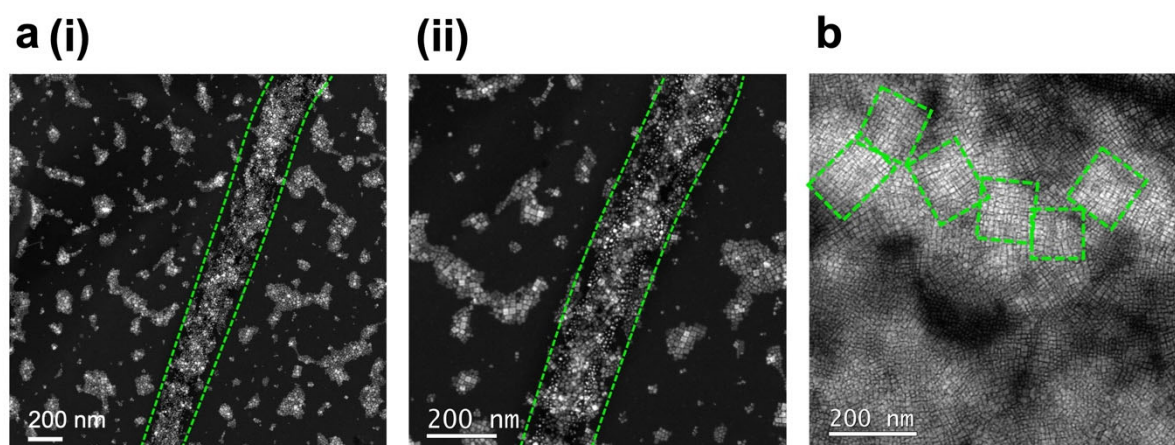

Figure S2. DF-STEM images of (a) FAPbBr<sub>3</sub> SS, and (b) CsPbBr<sub>3</sub> SSs, with green lines/boxes emphasizing location of SSs. (i) and (ii) show the same FAPbBr<sub>3</sub> SS at different magnifications.

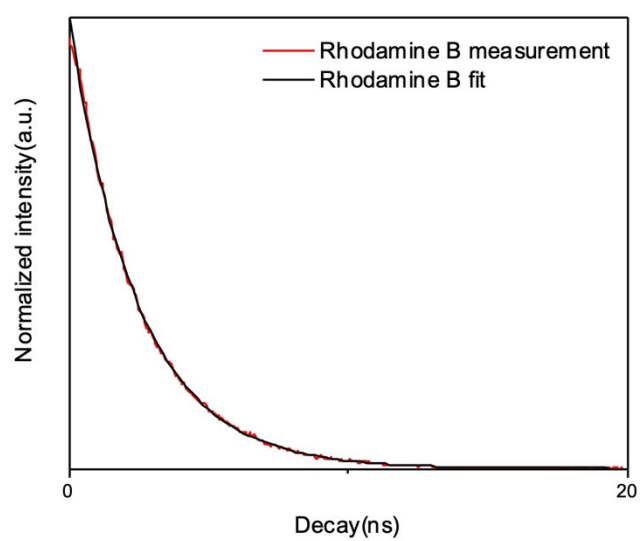

**Figure S3.** PL decay profile of Rhodamine B was used as the standard reference.

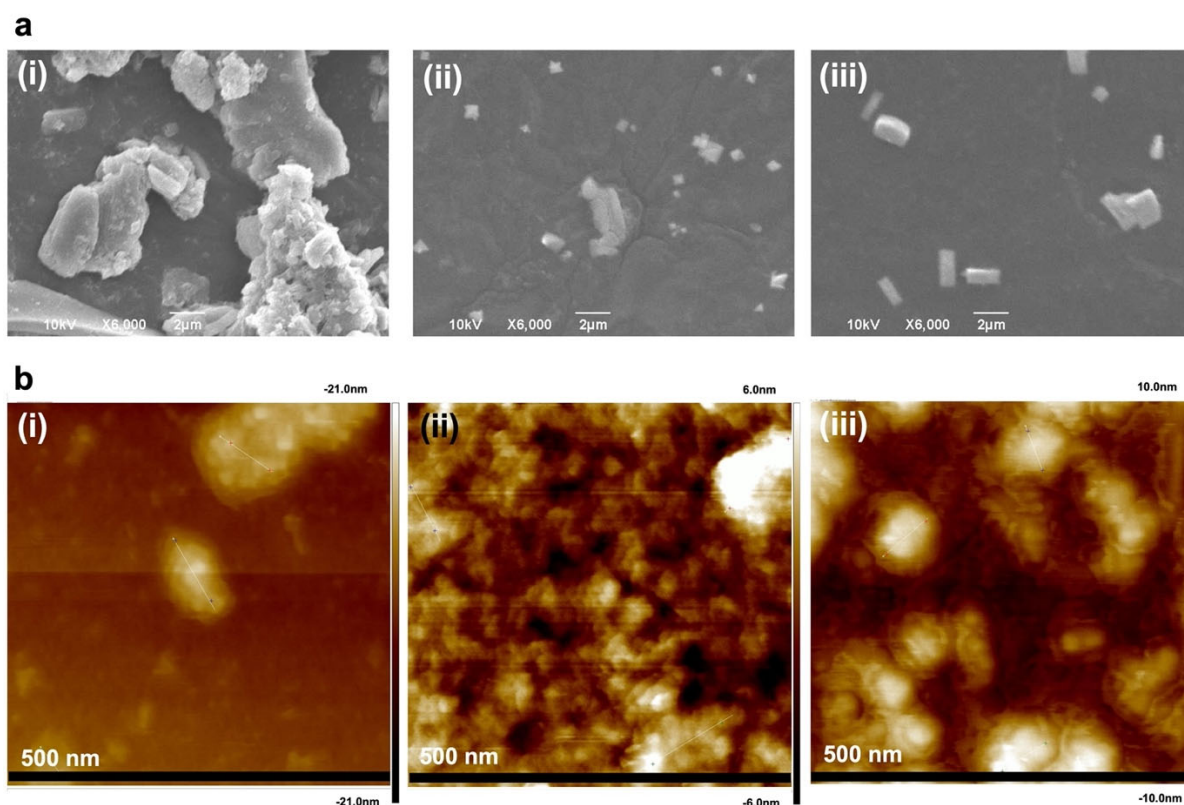

**Figure S4.** SEM micrographs of (a)(i) MAPbBr<sub>3</sub>, (ii) FAPbBr<sub>3</sub>, and (iii) CsPbBr<sub>3</sub> NCs. AFM height images of (b)(i) MAPbBr<sub>3</sub>, (ii) FAPbBr<sub>3</sub>, and (iii) CsPbBr<sub>3</sub> NCs.

**Table S1.** Optical performance of MAPbBr<sub>3</sub> colloidal solution.

| Concentration ( $\mu\text{g mL}^{-1}$ ) | CIE X  | CIE Y  | Peak (nm) | FWHM (nm) |
|-----------------------------------------|--------|--------|-----------|-----------|
| 30                                      | 0.0666 | 0.6692 | 508       | 22        |
| 50                                      | 0.0657 | 0.6676 | 509       | 23        |
| 100                                     | 0.067  | 0.6767 | 508       | 22        |
| 200                                     | 0.0681 | 0.6811 | 509       | 21        |
| 300                                     | 0.0693 | 0.6819 | 509       | 23        |

|        |        |        |     |    |
|--------|--------|--------|-----|----|
| 500    | 0.0697 | 0.6865 | 510 | 22 |
| 1000   | 0.0732 | 0.6944 | 510 | 22 |
| 2000   | 0.0764 | 0.6937 | 511 | 21 |
| 4000   | 0.0858 | 0.7347 | 513 | 20 |
| 7000   | 0.1019 | 0.7688 | 516 | 19 |
| 10,000 | 0.1129 | 0.7743 | 518 | 19 |
| 20,000 | 0.1355 | 0.7776 | 521 | 20 |

**Table S2.** Optical performance of FAPbBr<sub>3</sub> colloidal solution.

| Concentration ( $\mu\text{g mL}^{-1}$ ) | CIE X  | CIE Y  | Peak (nm) | FWHM (nm) |
|-----------------------------------------|--------|--------|-----------|-----------|
| 30                                      | 0.1546 | 0.7673 | 525       | 25        |
| 50                                      | 0.1559 | 0.7624 | 526       | 27        |
| 100                                     | 0.1606 | 0.7609 | 527       | 27        |
| 200                                     | 0.162  | 0.7634 | 527       | 26        |
| 300                                     | 0.1656 | 0.7624 | 527       | 26        |
| 500                                     | 0.171  | 0.7601 | 528       | 26        |
| 1000                                    | 0.1724 | 0.76   | 529       | 26        |
| 2000                                    | 0.1754 | 0.7587 | 529       | 26        |
| 3000                                    | 0.1808 | 0.7576 | 530       | 25        |
| 5000                                    | 0.196  | 0.7554 | 531       | 24        |
| 10,000                                  | 0.2226 | 0.7469 | 535       | 21        |
| 20,000                                  | 0.2495 | 0.7301 | 537       | 20        |

**Table S3.** Optical performance of CsPbBr<sub>3</sub> colloidal solution.

| Concentration ( $\mu\text{g mL}^{-1}$ ) | CIE X  | CIE Y  | Peak (nm) | FWHM (nm) |
|-----------------------------------------|--------|--------|-----------|-----------|
| 100                                     | 0.0507 | 0.5919 | 507       | 24        |
| 200                                     | 0.0521 | 0.5863 | 507       | 25        |
| 300                                     | 0.0518 | 0.5949 | 507       | 24        |
| 500                                     | 0.0534 | 0.6086 | 508       | 24        |
| 1000                                    | 0.0557 | 0.6499 | 509       | 22        |
| 2000                                    | 0.0623 | 0.7188 | 512       | 19        |
| 4000                                    | 0.076  | 0.7665 | 515       | 17        |
| 7000                                    | 0.0941 | 0.7853 | 517       | 16        |
| 10,000                                  | 0.1038 | 0.7887 | 518       | 16        |
| 20,000                                  | 0.1183 | 0.7889 | 521       | 16        |

**Table S4.** Fitting parameters for Rhodamine B.

| Equation: $y = y_0 + A_1 e^{-(x-x_0)/t_1}$ |                          |
|--------------------------------------------|--------------------------|
| $y_0$                                      | $3.47417 \times 10^{-4}$ |
| $A_1$                                      | 1.04531                  |
| $x_0$                                      | 0.00641                  |
| $t_1$                                      | 2.46078                  |

**Table S5.** Fitting parameters for MAPbBr<sub>3</sub>.

| Equation: $y = y_0 + A_1 e^{-(x-x_0)/t_1} + A_2 e^{-(x-x_0)/t_2}$ |          |          |
|-------------------------------------------------------------------|----------|----------|
|                                                                   | SSs      | NCs      |
| $y_0$                                                             | 0.00355  | 0.00382  |
| $x_0$                                                             | 0.23568  | -0.76354 |
| $A_1$                                                             | 0.45082  | 0.68597  |
| $t_1$                                                             | 8.16115  | 5.80553  |
| $A_2$                                                             | 0.51815  | 0.38134  |
| $t_2$                                                             | 31.59794 | 26.68215 |
| $\tau_{average}$ (ns)                                             | 27.3     | 20.8     |

**Table S6.** Fitting parameters for FAPbBr<sub>3</sub>.

| Equation: $y = y_0 + A_1 e^{-(x-x_0)/t_1} + A_2 e^{-(x-x_0)/t_2}$ |          |          |
|-------------------------------------------------------------------|----------|----------|
|                                                                   | SSs      | NCs      |
| $y_0$                                                             | 0.00629  | 0.01865  |
| $x_0$                                                             | -0.41117 | -0.32434 |
| $A_1$                                                             | 0.6326   | 0.7142   |
| $t_1$                                                             | 9.72035  | 5.67985  |
| $A_2$                                                             | 0.41514  | 0.30154  |
| $t_2$                                                             | 42.87193 | 20.86572 |
| $\tau_{average}$ (ns)                                             | 34.4     | 14.9     |

**Table S7.** Fitting parameters for CsPbBr<sub>3</sub>.

| Equation: $y = y_0 + A_1 e^{-(x-x_0)/t_1} + A_2 e^{-(x-x_0)/t_2}$ |        |         |
|-------------------------------------------------------------------|--------|---------|
|                                                                   | SSs    | NCs     |
| $y_0$                                                             | 0.0137 | 0.01234 |

|                       |          |          |
|-----------------------|----------|----------|
| $x_0$                 | -0.52144 | -0.6776  |
| $A_1$                 | 0.63601  | 0.96134  |
| $t_1$                 | 7.39563  | 3.5217   |
| $A_2$                 | 0.38505  | 0.22251  |
| $t_2$                 | 39.21957 | 22.76281 |
| $\tau_{average}$ (ns) | 31.7     | 15.1     |

**Table S8.** Section analysis of AFM images.

| Sample              | Thickness (nm)                    | Roughness (nm)                      |
|---------------------|-----------------------------------|-------------------------------------|
| MAPbBr <sub>3</sub> | SS film: 5.82<br>NC cluster: 4.64 | SS film: 1.81<br>NC cluster: 1.07   |
| FAPbBr <sub>3</sub> | SS film: 1.88<br>NC cluster: 2.36 | SS film: 0.68<br>NC cluster: 0.75   |
| CsPbBr <sub>3</sub> | SS film: 2.75<br>NC cluster: 2.94 | SS film: 0.942<br>NC cluster: 0.789 |
